# Supplementary material
Source: publisher site journal article supplement (https://www.spandidos-publications.com/444/downloadSupplementary)
Supplement: Supplementary file 1 [file downloadSupplementary]

Table SI. Summary of statistics of included studies with genotypes 1/2.

## A, Changes in HOMA-IR

| First author (year)               | Diff in means of<br>change in HOMA-IR | Lower limit | Upper limit | Z-value | P-value | (Refs.) |
|-----------------------------------|---------------------------------------|-------------|-------------|---------|---------|---------|
| Kim (2009)                        | -2.770                                | -6.150      | 0.610       | -1.606  | 0.108   | (22)    |
| Kawaguchi (2009)                  | -0.190                                | -0.724      | 0.344       | -0.698  | 0.485   | (34)    |
| Petta (2009)                      | -0.209                                | -0.787      | 0.369       | -0.708  | 0.479   | (26)    |
| Kawaguchi (2007)                  | -0.621                                | -1.062      | -0.181      | -2.764  | 0.006   | (20)    |
| Combined                          | -0.403                                | -0.695      | -0.111      | -2.708  | 0.007   |         |
| Combined without Kawaguchi (2007) | -0.233                                | -0.623      | 0.157       | -1.172  | 0.241   | (20)    |

B, Changes in HOMA- $\beta$ 

| First author (year)               | Diff in means of<br>change in HOMA- $\beta$ | Lower limit | Upper limit | Z-value | P-value | (Refs.) |
|-----------------------------------|---------------------------------------------|-------------|-------------|---------|---------|---------|
| Kawaguchi (2009)                  | -33.000                                     | -117.771    | 51.771      | -0.763  | 0.445   | (34)    |
| Kawaguchi (2007)                  | -15.021                                     | -22.985     | -7.058      | -3.697  | 0.000   | (20)    |
| Combined effect                   | -15.179                                     | -23.107     | -7.250      | -3.752  | 0.000   |         |
| Combined without Kawaguchi (2007) | -33.000                                     | -117.771    | 51.771      | -0.763  | 0.445   | (20)    |

Diff, difference; HOMA, homeostasis model assessment; IR, insulin resistance.
